# Supplementary material for: Longitudinal variation in SARS-CoV-2 antibody levels and emergence of viral variants: implications for the ability of serological assays to predict immunity
Source: PubMed Central journal article supplement — medRxiv. 2021 Jul 7:2021.07.02.21259939. Preprint. [Version 1] doi: 10.1101/2021.07.02.21259939 (PMC8282113; doi:10.1101/2021.07.02.21259939), 2021-07-07

## supplementary figure 1

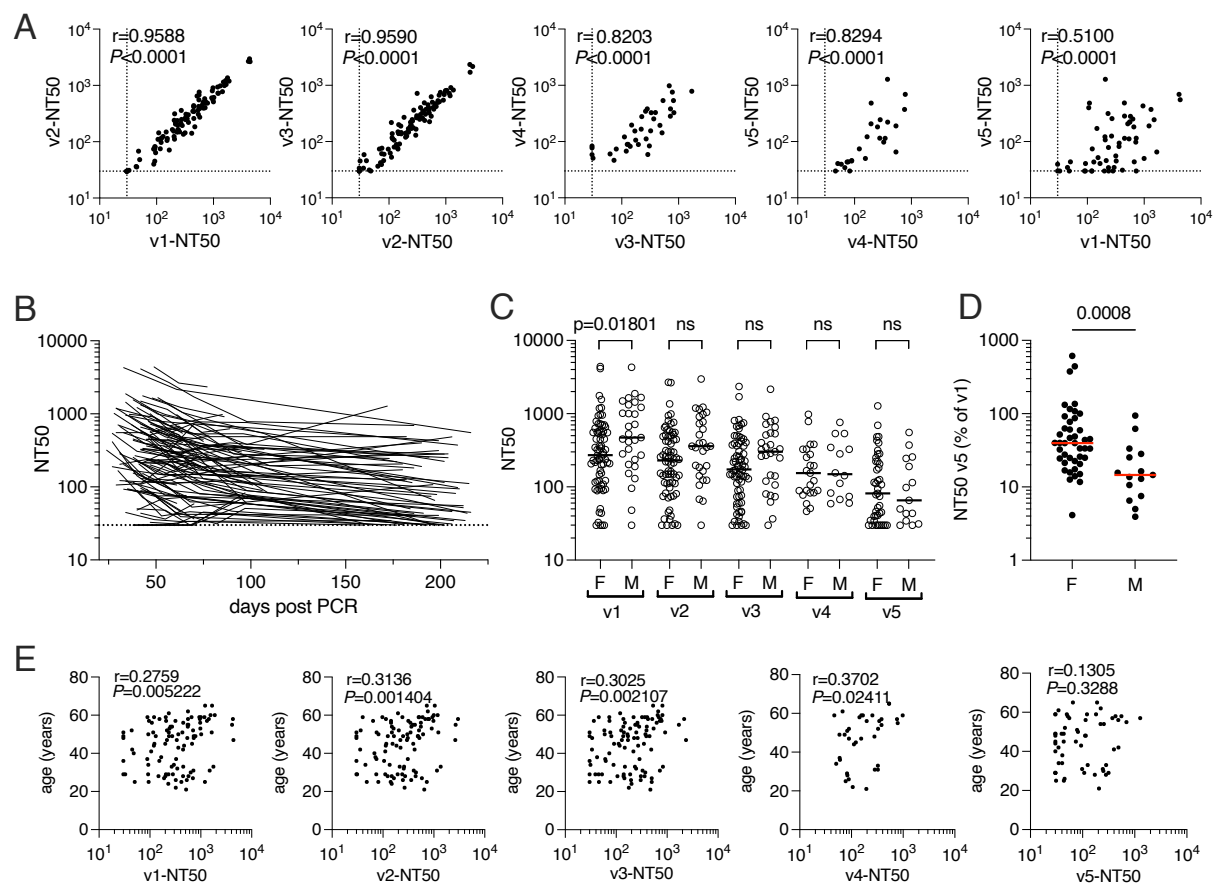

## supplementary figure 2

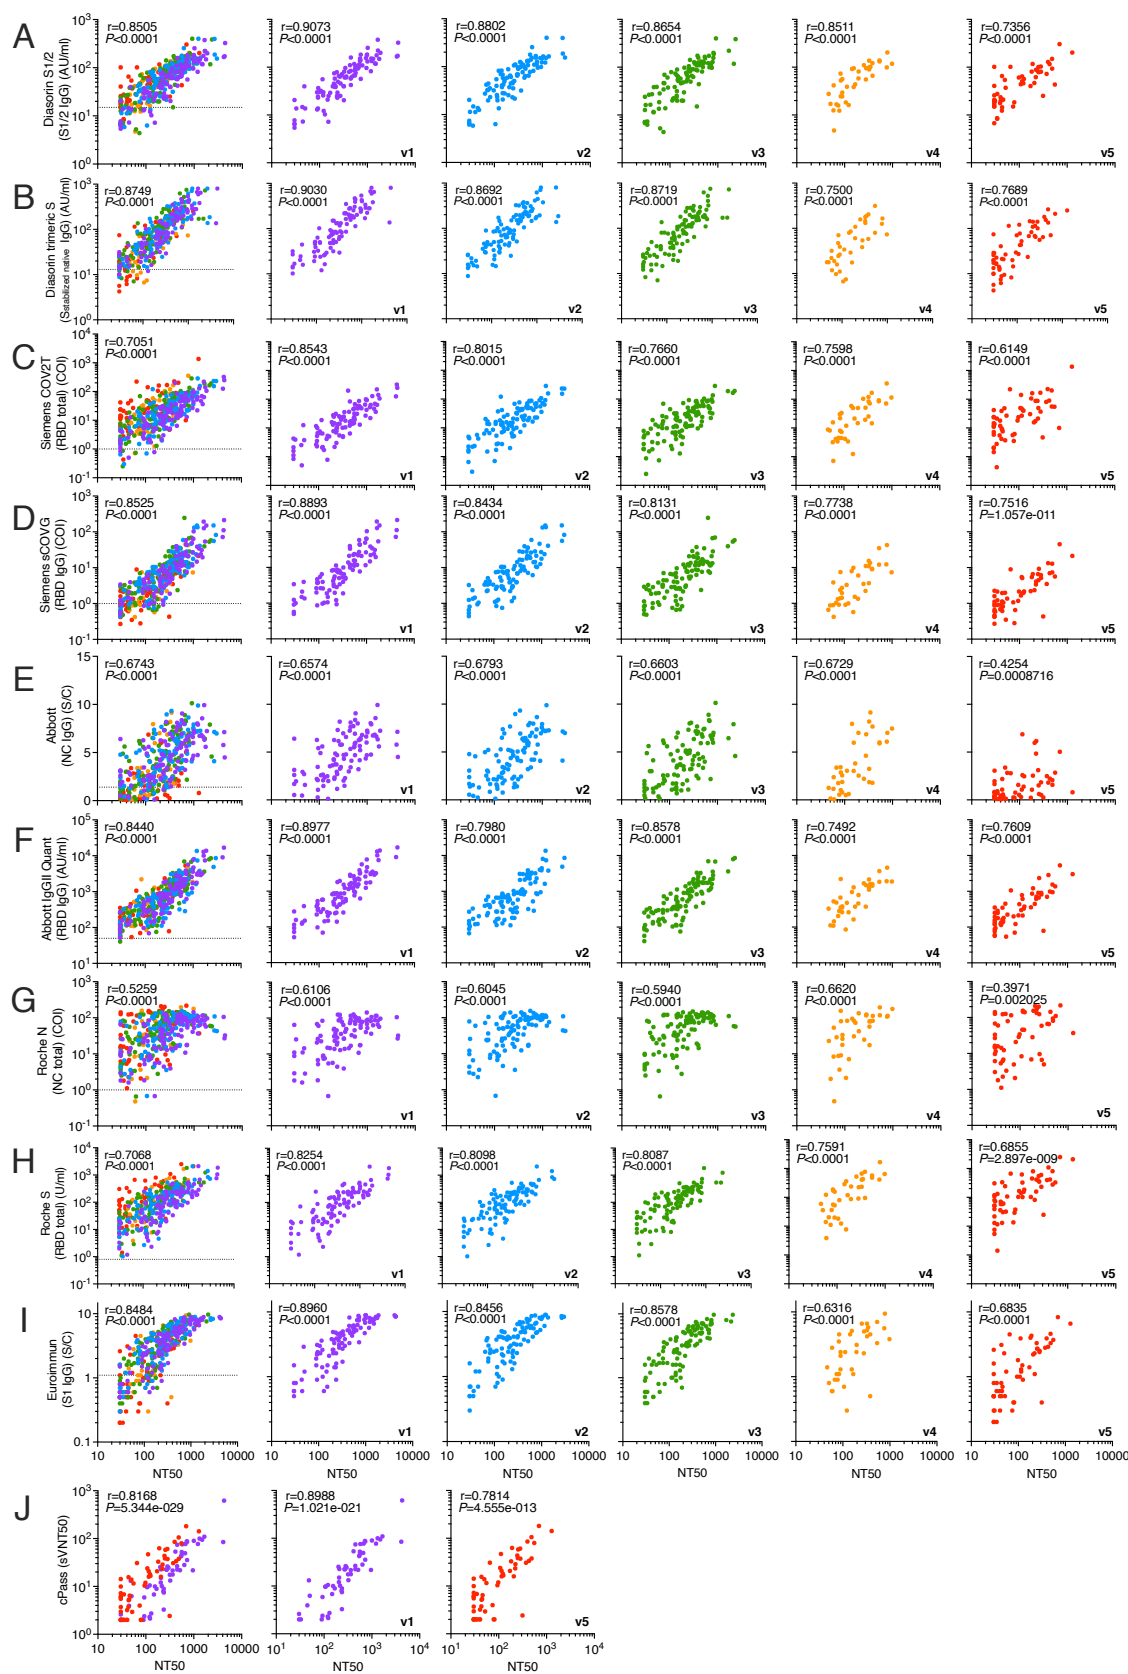

### supplementary figure 3

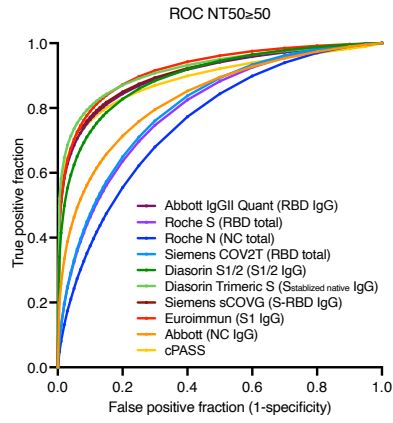

## supplementary figure 4

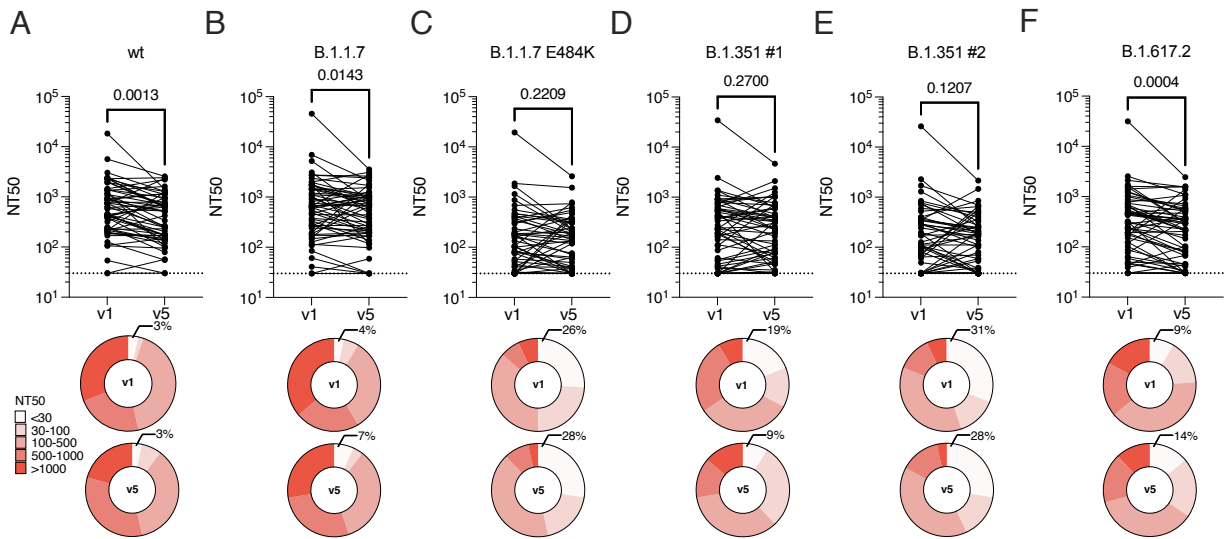

supplementary figure 5

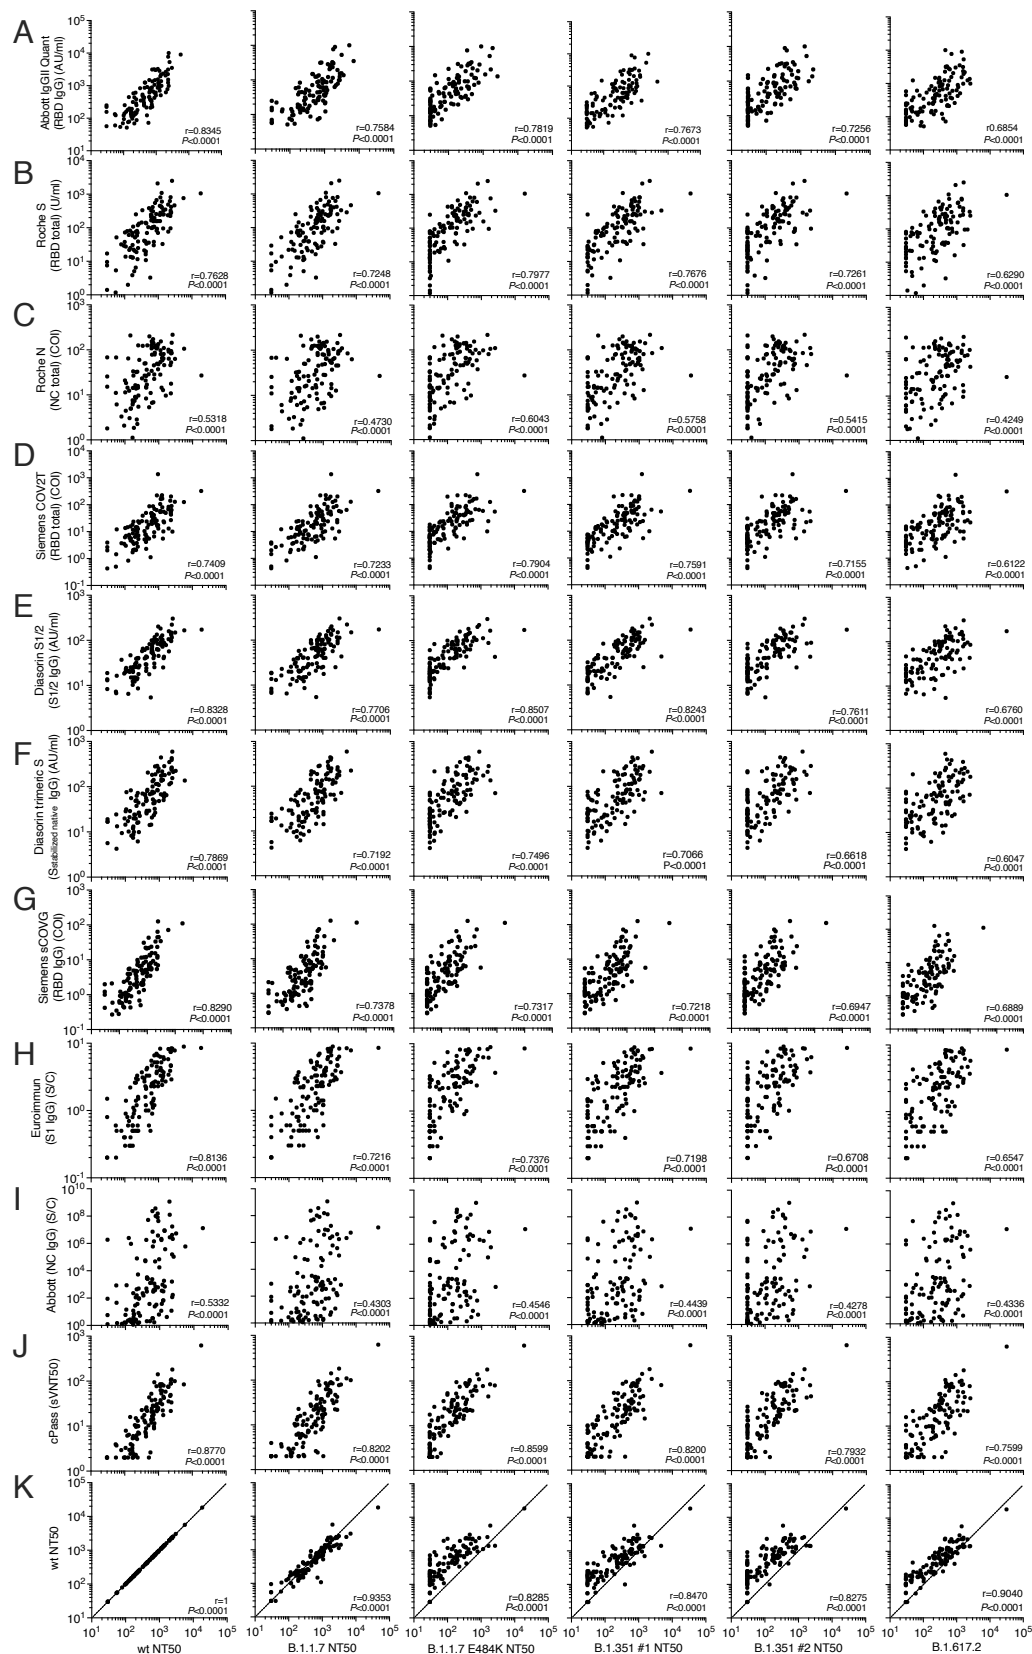

Supplement: NIHPP2021.07.02.21259939V1-supplement-1.pdf [file NIHPP2021.07.02.21259939V1-supplement-1.pdf]
